# Supplementary material for: Physiotherapy Improves Dogs’ Quality of Life Measured with the Milan Pet Quality of Life Scale: Is Pain Involved?
Source: MDPI journal article supplement (doi:10.3390/vetsci9070335), 2022-07-02
Supplement: s1 [file s1]

**Table S1.** Demographic data of the dogs

| <b>Name</b>    | <b>Age<br/>(years)</b> | <b>Sex</b>      | <b>Breed</b>                  | <b>Condition</b> | <b>Treatment</b>            | <b>Duration<br/>(weeks)</b> |
|----------------|------------------------|-----------------|-------------------------------|------------------|-----------------------------|-----------------------------|
| <b>Wilson</b>  | 1                      | Intact male     | Australian shepherd           | Orthopaedic      | Hydrotherapy                | 4                           |
| <b>Ettore</b>  | 4                      | Intact male     | French bulldog                | Neurological     | Hydrotherapy & Instrumental | 4                           |
| <b>Yoda</b>    | 8                      | Neutered female | Pug                           | Neurological     | Hydrotherapy                | 4                           |
| <b>Osvaldo</b> | 8                      | Intact male     | Boxer                         | Neurological     | Hydrotherapy & Instrumental | 4                           |
| <b>Lara</b>    | 10                     | Neutered female | Italian bloodhound            | Orthopaedic      | Hydrotherapy                | 4                           |
| <b>Ryan</b>    | 1                      | Intact male     | Border collie                 | Orthopaedic      | Hydrotherapy & Instrumental | 6                           |
| <b>Tommy</b>   | 14                     | Intact male     | Poodle                        | Orthopaedic      | Instrumental                | 4                           |
| <b>Margot</b>  | 4                      | Neutered female | Australian shepherd           | Orthopaedic      | Hydrotherapy & Instrumental | 4                           |
| <b>Serse</b>   | 4                      | Neutered male   | Cane corso                    | Degenerative     | Hydrotherapy & Instrumental | 4                           |
| <b>Kira</b>    | 5                      | Neutered female | Mixed breed                   | Orthopaedic      | Hydrotherapy & Instrumental | 4                           |
| <b>Ettore</b>  | 4                      | Intact male     | Shar-pei                      | Neurological     | Hydrotherapy                | 5                           |
| <b>Trevor</b>  | 5                      | Neutered male   | Mixed breed                   | Orthopaedic      | Hydrotherapy                | 3                           |
| <b>Erik</b>    | 2                      | Intact male     | Cane corso                    | Orthopaedic      | Hydrotherapy                | 6                           |
| <b>Idylle</b>  | 7                      | Neutered female | Belgian shepherd<br>terveuren | Orthopaedic      | Hydrotherapy & Instrumental | 4                           |
| <b>Lucy</b>    | 5                      | Neutered female | Mixed bred                    | Orthopaedic      | Hydrotherapy & Instrumental | 4                           |
| <b>Picci</b>   | 4                      | Neutered female | American bulldog              | Orthopaedic      | Hydrotherapy & Instrumental | 4                           |
| <b>Arya</b>    | 5                      | Intact female   | Spanish greyhound             | Orthopaedic      | Hydrotherapy & Instrumental | 4                           |
| <b>Locki</b>   | 4                      | Intact male     | Siberian husky                | Orthopaedic      | Hydrotherapy                | 4                           |
| <b>Pedro</b>   | 11                     | Neutered male   | Labrador retriever            | Degenerative     | Hydrotherapy & Instrumental | 7                           |
| <b>Cody</b>    | 1                      | Intact male     | Poodle                        | Degenerative     | Hydrotherapy                | 6                           |

**Table S2.** Medical checklist. For each time (T<sub>0</sub> and T<sub>1</sub>) median value and range (in brackets) are reported.

| Variable               | Definition                                                               | T <sub>0</sub> | T <sub>1</sub> |
|------------------------|--------------------------------------------------------------------------|----------------|----------------|
| BCS                    | Body Condition Score<br>1=underweight<br>2=normal weight<br>3=overweight | 2 (2-3)        | 2 (2-3)        |
| Appetite               | 1=improved<br>2=same as before<br>3=worsened                             | 3 (1-3)        | 3 (1-3)        |
| Playfulness            | 1=improved<br>2=same as before<br>3=worsened                             | 1 (1-3)        | 2 (2-3)        |
| Interaction with owner | 1=improved<br>2=same as before<br>3=worsened                             | 1 (1-3)        | 2 (1-2)        |
| Walking                | 1=improved<br>2=same as before<br>3=worsened                             | 1 (1-3)        | 2 (1-2)        |
| Lameness               | 1=none<br>2=mild<br>3=moderate<br>4=severe                               | 2 (1-4)        | 1 (1-3)        |
| Pain                   | 1=none<br>2=mild<br>3=moderate<br>4=severe                               | 2 (1-4)        | 1 (1-3)        |
| Movement               | 1=improved<br>2=same as before<br>3=worsened                             | 1 (1-3)        | 1 (1-2)        |
| Criticality            | 1=mild<br>2=moderate<br>3=severe                                         | 2 (1-3)        | 1 (1-2)        |

**Table S3.** MQPL norms for each time of assessment (T<sub>0</sub> vs T<sub>1</sub>).

| Domain        | T <sub>0</sub> |      |           |          | T <sub>1</sub> |      |           |          |
|---------------|----------------|------|-----------|----------|----------------|------|-----------|----------|
|               | Mdn (Min-Max)  | SE   | Skeweness | Kurtosis | Mdn (Min-Max)  | SE   | Skeweness | Kurtosis |
| Physical      | 61 (50-72)     | 1.24 | 0.04      | -0.55    | 62 (56-72)     | 0.83 | 0.52      | 0.06     |
| Psychological | 120 (95-130)   | 1.34 | -0.86     | -0.03    | 128 (116-138)  | 0.96 | 0.02      | -0.93    |

|                      |            |      |       |       |            |          |       |       |
|----------------------|------------|------|-------|-------|------------|----------|-------|-------|
| <b>Social</b>        | 10 (8-13)  | 0.42 | 0.26  | -1.55 | 11 (8-13)  | 0.4<br>3 | -0.11 | -1.78 |
| <b>Environmental</b> | 38 (24-44) | 1.19 | -0.61 | -0.50 | 38 (27-45) | 0.9<br>6 | -0.39 | -0.40 |

---

**Table S4.** Variables selections for the regression models.

| Predictor                    | QOL physical                                    | QOL psychological                                | QOL social                                       | QOL environmental                               |
|------------------------------|-------------------------------------------------|--------------------------------------------------|--------------------------------------------------|-------------------------------------------------|
| Age <sup>a</sup>             | $r = -0.21, p = 0.182$                          | <b><math>r = 0.78, p = 0.046</math></b>          | $r = 0.21, p = 0.192$                            | $r = 0.25, p = 0.115$                           |
| Sex <sup>b</sup>             | $\chi^2 (df=3)=7.66, p=0.053$                   | $\chi^2 (df=3)=3.64, p=0.303$                    | $\chi^2 (df=3)=7.48, p=0.058$                    | $\chi^2 (df=3)=4.45, p=0.217$                   |
| Medical problem <sup>b</sup> | $\chi^2 (df=2)=4.60, p=0.100$                   | $\chi^2 (df=2)=1.00, p=0.606$                    | <b><math>\chi^2 (df=2)=8.51, p=0.014</math></b>  | <b><math>\chi^2 (df=2)=6.88, p=0.032</math></b> |
| Lameness <sup>b</sup>        | $\chi^2 (df=3)=5.95, p=0.114$                   | $\chi^2 (df=3)=1.24, p=0.744$                    | <b><math>\chi^2 (df=3)=13.64, p=0.003</math></b> | $\chi^2 (df=3)=0.19, p=0.978$                   |
| Pain <sup>b</sup>            | <b><math>\chi^2 (df=3)=7.97, p=0.046</math></b> | $\chi^2 (df=3)=7.03, p=0.071$                    | $\chi^2 (df=3)=4.15, p=0.246$                    | $\chi^2 (df=3)=3.49, p=0.322$                   |
| Movement <sup>b</sup>        | $\chi^2 (df=2)=3.54, p=0.170$                   | $\chi^2 (df=2)=1.92, p=0.382$                    | $\chi^2 (df=2)=0.77, p=0.680$                    | $\chi^2 (df=2)=4.74, p=0.093$                   |
| Criticality <sup>b</sup>     | <b><math>\chi^2 (df=2)=7.47, p=0.024</math></b> | $\chi^2 (df=2)=5.45, p=0.066$                    | $\chi^2 (df=2)=1.71, p=0.426$                    | $\chi^2 (df=2)=0.49, p=0.782$                   |
| Treatment <sup>b</sup>       | $\chi^2 (df=2)=1.35, p=0.509$                   | $\chi^2 (df=2)=0.77, p=0.680$                    | $\chi^2 (df=2)=3.20, p=0.074$                    | $\chi^2 (df=2)=0.79, p=0.674$                   |
| Time <sup>b</sup>            | $\chi^2 (df=1)=3.42, p=0.064$                   | <b><math>\chi^2 (df=1)=10.56, p=0.001</math></b> | $\chi^2 (df=1)=0.65, p=0.420$                    | $\chi^2 (df=1)=0.11, p=0.744$                   |

Note: bold =  $p < 0.05$ , <sup>a</sup> = Spearman correlation, b = Kruskal-Wallis rank sum test.
